# Supplementary material for: Application of HPCCC Combined with Polymeric Resins and HPLC for the Separation of Cyclic Lipopeptides Muscotoxins A–C and Their Antimicrobial Activity
Source: MDPI journal article supplement (doi:10.3390/molecules23102653), 2018-10-16
Supplement: s1 [file s1]

# Application of HPLC combined with polymeric resins and HPLC for the separation of cyclic lipopeptides muscotoxins A-C and their anti-microbial activity.

José Cheel <sup>1\*</sup>, Jan Hájek <sup>1</sup>, Marek Kuzma<sup>2</sup>, Kumar Saurav <sup>1</sup>, Iva Smýkalová<sup>3</sup>, Eliška Ondráčková<sup>3</sup>, Petra Urajová <sup>1</sup>, Dai Long Vu <sup>1</sup>, Karine Faure <sup>4</sup>, Jiří Kopecký <sup>1</sup> and Pavel Hrouzek <sup>1\*</sup>

<sup>1</sup> Laboratory of Algal Biotechnology-Centre ALGATECH, Institute of Microbiology of the Czech Academy of Sciences, Opatovický mlýn, Novohradská 237, 379 81, Třeboň, Czech Republic; jcheel@alga.cz (J.C.) ; hajek@alga.cz (J.H); urajova@alga.cz (P.U.); longvu@alga.cz (D.L.V.); sauravverma17@gmail.com (K.S.); kopecky@alga.cz (J.K.); hrouzek@alga.cz (P.H.)

<sup>2</sup> Laboratory of Molecular Structure Characterization, Institute of Microbiology of the Czech Academy of Sciences, Vídeňská 1083, 142 20 Prague, Czech Republic; kuzma@biomed.cas.cz

<sup>3</sup> Plant Biotechnology Department, AGRITEC Plant Research Ltd., Zemědělská 2520/16, 787 01 Šumperk, Czech Republic; smykalova@agritec.cz; ondrackova@agritec.cz

<sup>4</sup> University of Lyon, CNRS, Université Claude Bernard Lyon 1, Ens de Lyon, Institut des Sciences Analytiques, UMR 5280, 5 rue de la Doua, 69100, Villeurbanne, France; karine.faure@isa-lyon.fr

\* Correspondence: jcheel@alga.cz; jcheel@email.cz (J.C.); hrouzek@alga.cz (P.H.) ; Tel.: +420-384-340-465

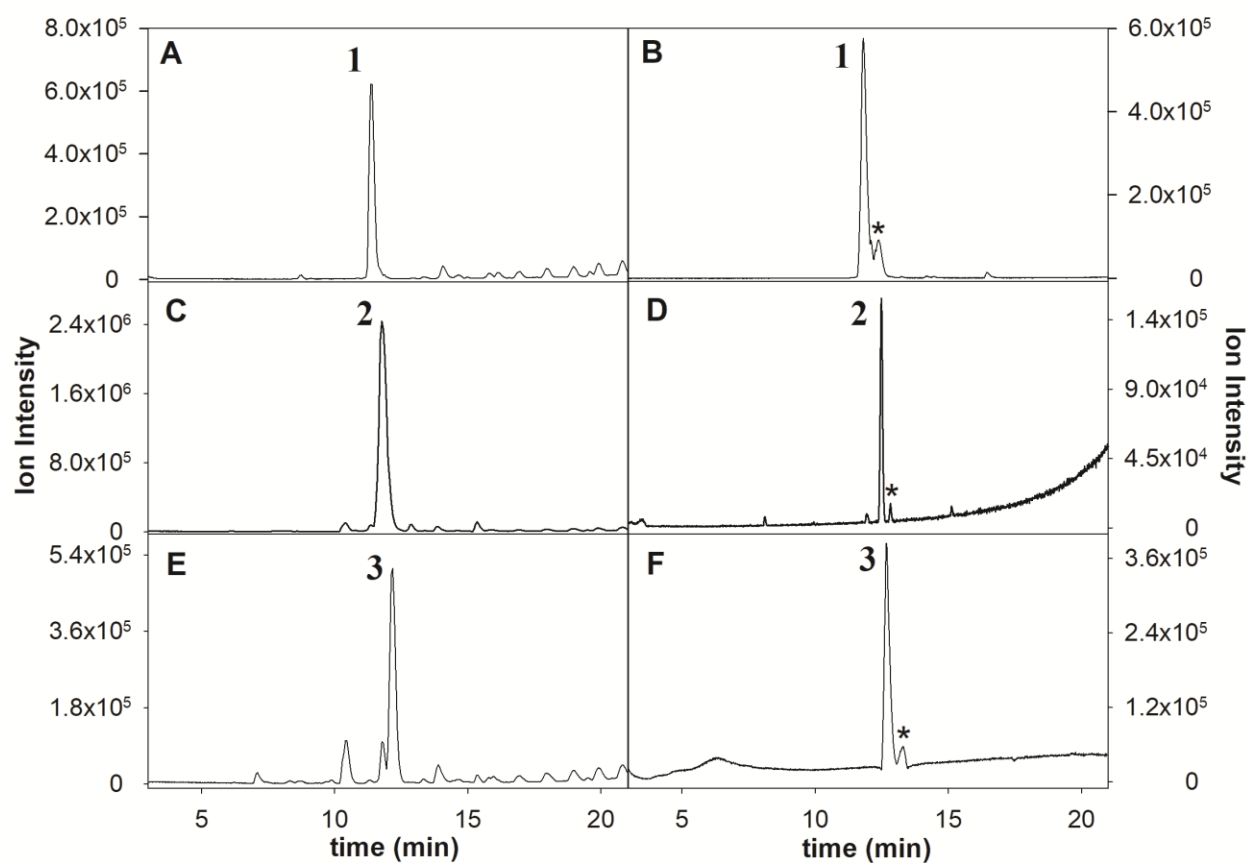

**Figure S1.** The HPLC–ESI–HRMS chromatograms of muscotoxins separated by HPCCC (a). The HPLC–ESI–HRMS chromatograms of muscotoxins obtained by HPCCC and followed by HPLC purification (b). The asterisk (\*) denoted the peak of the isobaric compound (stereoisomer) related to the muscotoxin variant of interest.
